# Supplementary material for: Therapeutic targeting of NOTCH signaling ameliorates immune-mediated bone marrow failure of aplastic anemia
Source: PubMed Central journal article supplement — J Exp Med. 2013 Jul 1;210(7):1311–29. doi: 10.1084/jem.20112615 (PMC3698520; doi:10.1084/jem.20112615), 2013-07-01
Supplement: supp_jem.20112615_JEM_20112615_sm.pdf [file supp_jem.20112615_JEM_20112615_sm.pdf]

## SUPPLEMENTAL MATERIAL

Roderick et al., <http://www.jem.org/cgi/content/full/jem.20112615/DC1>**Table S1.** List of antibodies used for surface and intracellular staining of murine samples

| Antigen                     | Species     | Clone      | Company     |
|-----------------------------|-------------|------------|-------------|
| <b>FITC conjugated</b>      |             |            |             |
| CD4 (L3T4)                  | Mouse       | H129.19    | BD          |
| CD8a (Ly-2)                 | Mouse       | 53-6.7     | BD          |
| CD25                        | Mouse       | 7D4        | BD          |
| <b>PE conjugated</b>        |             |            |             |
| CD3e                        | Mouse       | 145-2C11   | BD          |
| CD8a                        | Mouse       | 53-6.7     | BD          |
| Granzyme B                  | Mouse       | GB11       | eBioscience |
| IFN- $\gamma$               | Mouse       | DB-1       | BD          |
| Notch 1 (IC)                | Mouse/Human | mN1A       | eBioscience |
| Sca-1 (Ly6A/E)              | Mouse       | D7         | eBioscience |
| T-bet                       | Mouse/Human | eBio4B10   | eBioscience |
| Ter-119                     | Mouse       | TER-119    | eBioscience |
| Mouse IgG1 $\kappa$ isotype | Mouse       | P3.6.2.8.1 | eBioscience |
| <b>PerCP conjugated</b>     |             |            |             |
| CD4                         | Mouse       | RM4-5      | BD          |
| CD8a                        | Mouse       | 53-6.7     | BD          |
| CD45R/B220                  | Mouse       | RA3-6B2    | BD          |
| <b>APC conjugated</b>       |             |            |             |
| CD4 (L3T4)                  | Mouse       | GK1.5      | eBioscience |
| Ly-6C (Gr-1)                | Mouse       | RB6-8C5    | BD          |
| CD34                        | Mouse       | RAM34      | eBioscience |
| T-Bet                       | Mouse/Human | eBio4B10   | eBioscience |
| <b>PE-Cy7 conjugated</b>    |             |            |             |
| c-Kit (CD117)               | Mouse       | 2B8        | eBioscience |
| <b>Biotin lineage panel</b> |             |            |             |
| CD3e                        | Mouse       | 145-2C11   | BD          |
| CD11b (Mac-1)               | Mouse       | M1/70      | BD          |
| CD45R/B220                  | Mouse       | RA3-6B2    | BD          |
| Ly-6G and Ly-6C             | Mouse       | RB6-8C5    | BD          |
| TER-119                     | Mouse       | TER-119    | BD          |

**Table S2.** List of primers used for real-time PCR of mouse samples

| Symbol        | NCBI Nucleotide RefSeq accession no. | 5' primer sequence          | 3' primer sequence           | Product size |
|---------------|--------------------------------------|-----------------------------|------------------------------|--------------|
| <i>Actb</i>   | NM_007393                            | 5'-GGCTGTATTCCCCTCCATCG-3'  | 5'-CCAGTTGGTAACAATGCCATGT-3' | 154          |
| <i>Gzmb</i>   | NM_013542                            | 5'-CCACTCTCGACCCTACATGG-3'  | 5'-GGCCCCAAAGTGACATTTATT-3'  | 142          |
| <i>Hes1</i>   | NM_008235                            | 5'-CCAGCCAGTGTCAACACGA-3'   | 5'-AATGCCGGGAGCTATCTTTCT-3'  | 166          |
| <i>Ifng</i>   | NM_008337                            | 5'-ATGAACGCTACACACTGCATC-3' | 5'-CCATCCTTTTGCCAGTTCCTC-3'  | 182          |
| <i>Notch1</i> | NM_008714                            | 5'-CCCTTGCTCTGCCTAACGC-3'   | 5'-GGAGTCCTGGCATCGTTGG-3'    | 162          |
| <i>Notch2</i> | NM_010928                            | 5'-ATGTGGACGAGTGTCTGTTGC-3' | 5'-GGAAGCATAGGCACAGTCATC-3'  | 146          |
| <i>Notch3</i> | NM_008716                            | 5'-TGCCAGAGTTCAGTGGTGG-3'   | 5'-CACAGGCAAATCGGCCATC-3'    | 157          |
| <i>Pf4</i>    | NM_019932                            | 5'-GCCTGCACTTAAGAGCCCTA-3'  | 5'-GATCTCCATCGCTTCTTCG-3'    | 199          |
| <i>Prf1</i>   | NM_011073                            | 5'-AGCACAAGTTCGTGCCAGG-3'   | 5'-GCGTCTCTATTAGGGAGTTTTT-3' | 151          |
| <i>Rbpj</i>   | NM_009035                            | 5'-ATGCCCTCCGGTTTTCTC-3'    | 5'-GGACAAGCCCTCCGAGTAGT-3'   | 102          |
| <i>Tnf</i>    | NM_013693                            | 5'-GACGTGGAAGTGGCAGAAGAG-3' | 5'-TTGGTGGTTGTGAGTGTGAG-3'   | 228          |

**Table S3.** List of primers used for real-time PCR of human samples

| Symbol        | NCBI Nucleotide RefSeq accession no. | 5' primer sequence           | 3' primer sequence           | Product size |
|---------------|--------------------------------------|------------------------------|------------------------------|--------------|
| <i>GZMB</i>   | NM_004131                            | 5'-CCCTGGGAAAACACTCACACA-3'  | 5'-CACAACTCAATGGTACTGTCGT-3' | 109          |
| <i>HES1</i>   | NM_005524                            | 5'-GAGAGGCGGCTAAGGTGTTG-3'   | 5'-CTGGTGTAGACGGGGATGAC-3'   | 121          |
| <i>IFNG</i>   | NM_000619                            | 5'-CTCTTGGCTGTACTGCCAGG-3'   | 5'-CTCCACACTCTTTGGATGCT-3'   | 230          |
| <i>NOTCH1</i> | NM_017617                            | 5'-GAGGCGTGGCAGACTATGC-3'    | 5'-CTTGTACTCCGTGAGCGTGA-3'   | 140          |
| <i>NOTCH2</i> | NM_024408                            | 5'-GCCTTCGCCTCCTGTACTC-3'    | 5'-GCCCATTTAGGGGGTTGGT-3'    | 166          |
| <i>NOTCH3</i> | NM_000435                            | 5'-ACACAGGGCCACTATGTGAGA-3'  | 5'-CACAGTCGTAAGTGAGGTCGC-3'  | 102          |
| <i>JAG1</i>   | NM_000214                            | 5'-CAGTTCGAGTTGGAGATCCTGT-3' | 5'-CCTTGAGGCACACTTTGAAGTA-3' | 142          |
| <i>RPS9</i>   | NM_001013                            | 5'-TGTCGCAAAACTTATGTGACCC-3' | 5'-TCCAGACCTCACGTTTGTCC-3'   | 109          |
| <i>TBX21</i>  | NM_013351                            | 5'-CAAGGGGGCGTCCAACAAT-3'    | 5'-TCTGGCTCTCCGTCGTCA-3'     | 102          |
| <i>TNF</i>    | NM_000594                            | 5'-ATGAGCACTGAAAGCATGATCC-3' | 5'-GAGGGCTGATTAGAGAGAGGTC-3' | 217          |
| <i>PTCRA</i>  | NM_138296                            | 5'-AGCCCATCTGGTTCTCAG-3'     | 5'-AGGGCCATAGGTGAAGGCAT-3'   | 60           |
| <i>CDKN1A</i> | NM_078467                            | 5'-TGTCCTCAGAACCCATGC-3'     | 5'-AAAGTCGAAGTCCATCGCTC-3'   | 139          |
| <i>NRARP</i>  | NM_001004354                         | 5'-TCAACGTGAACTCGTTCGGG-3'   | 5'-ACTTCGCCTTGGTGATGAGAT-3'  | 201          |
| <i>DTX1</i>   | NM_004416                            | 5'-GACGGCTACGATATGGACAT-3'   | 5'-CCTAGCGATGAGAGGTCGAG-3'   | 84           |
